# Supplementary material for: A self-heated silicon nanowire array: selective surface modification with catalytic nanoparticles by nanoscale Joule heating and its gas sensing applications
Source: Royal Society of Chemistry journal article supplement (doi:10.1039/c3nr01640d), 2013-01-01
Supplement: c3nr01640d.pdf [file c3nr01640d.pdf]

## Supporting Information

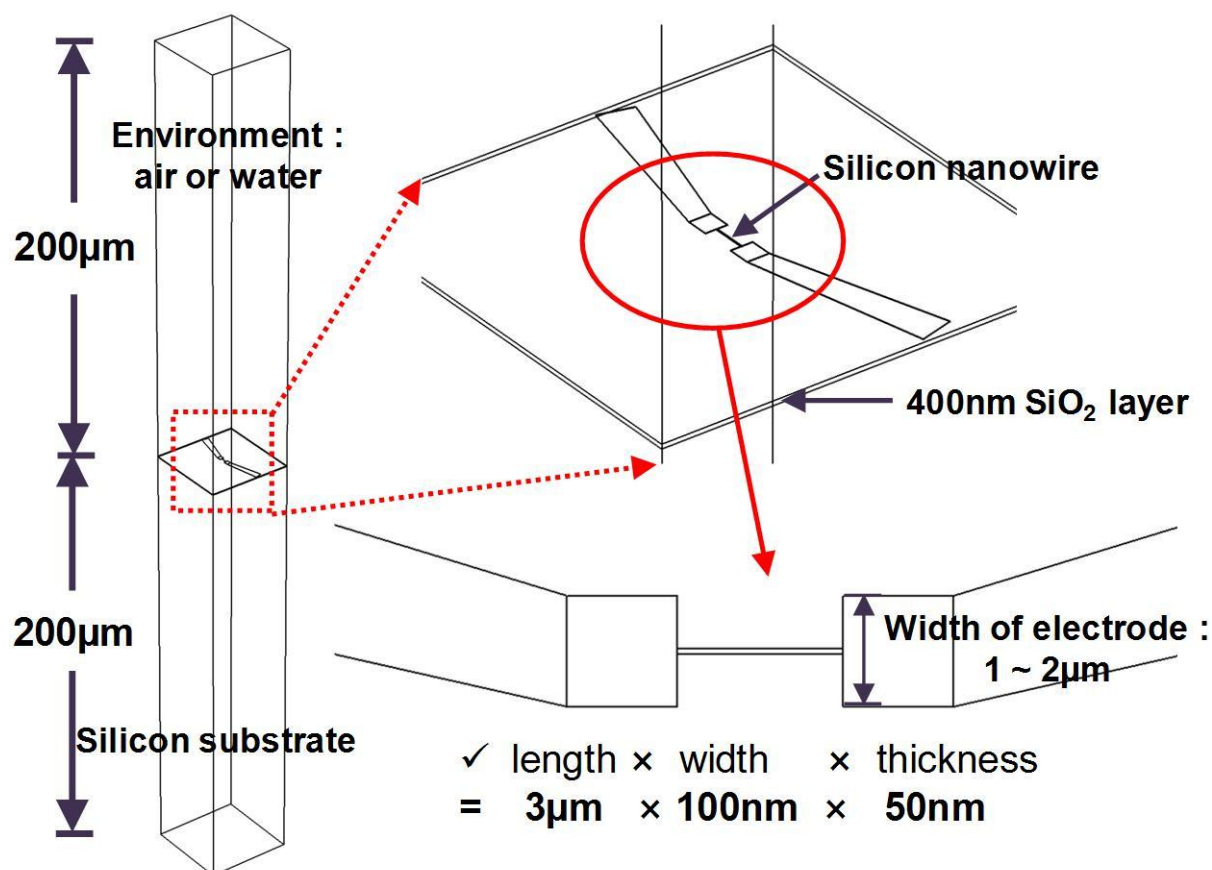

**Fig. S1** Model for the numerical simulation of SiNW Joule heating: 200  $\mu\text{m}$  long square (40  $\mu\text{m}$  × 40  $\mu\text{m}$ ) cylinders were defined as silicon substrate and environment. 400 nm thick square of silicon dioxide layer was defined on the silicon substrate. SiNW with 100 nm width, 3  $\mu\text{m}$  length, and 50 nm thickness was used for simulation.

Fig. S2 shows the normalized maximum temperature of the SiNW versus time for various frequencies of AC voltage by using a numerical simulation with COMSOL Multiphysics software. The maximum temperature is normalized by the equation below:

$$T_{\text{normalized}} = \frac{T_{\text{max}} - 293.15\text{K}}{T_{\text{DC,max}} - 293.15\text{K}}$$

where  $T_{\text{max}}$  is the maximum temperature of the SiNW under AC voltage and  $T_{\text{DC,max}}$  is the maximum temperature of the SiNW for a DC bias identical to the amplitude of the AC voltage. The frequency of temperature fluctuation is twice of the AC frequency, because Joule heating occurs by both positive and negative voltages.

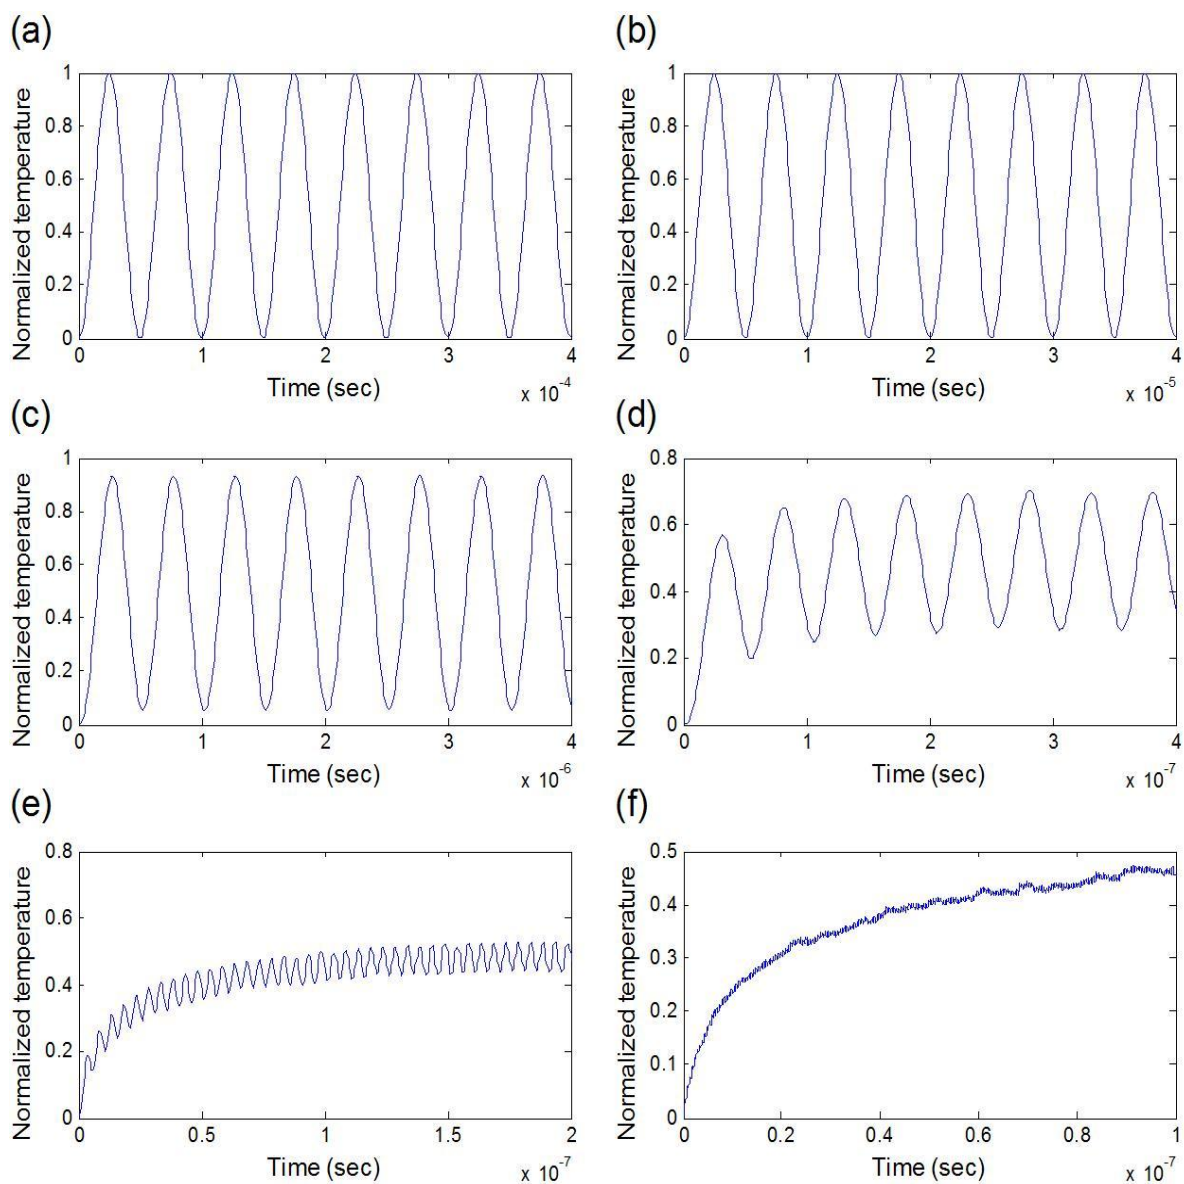

**Fig. S2** The normalized temperature of SiNW by AC Joule heating with different frequencies: (a) 10 kHz, (b) 100kHz, (c) 1MHz, (d) 10MHz, (e) 100MHz, and (f) 1GHz.
